# Supplementary material
Source: PubMed Central journal article supplement (PMC4032791)
Supplement: NIHMS579516-supplement-supplement_1.pdf [file NIHMS579516-supplement-supplement_1.pdf]

## SUPPLEMENTARY FIGURES

**Fig. S1 – related to Fig. 1: Ectopic expression of WT1  $-KTS^{GOF}$  prevents differentiation into steroidogenic cells.** (A) Schematic representation of the strategy used to generate *Rosa26: WT1-KTS* mice. SHA: Short homology arm, LHA: Long homology arm. An equivalent strategy was used to knock in the *Wt1+KTS* cDNA. (B) Southern blot showing a positively targeted (left lane) and a negative (right lane) clone. (C) WT1 (blue) SF1 (red) and GATA4 (green) immunofluorescence on adrenal sections from CTR and  $-KTS^{GOF}$  embryos at E12.5, E13.5 and E14.5. (D) Hematoxylin and eosin staining on adrenal section from E14.5 (left panels) and E 18.5 (right panels) CTR and  $-KTS^{GOF}$  embryos. (E) *21 hydroxylase* RNA *in situ* hybridization on sections from CTR and  $-KTS^{GOF}$  E18.5 old embryos. Note the increased signal intensity in the remaining  $-KTS^{GOF}$  steroidogenic cells. Please note that the cytoplasmic WT1 staining in control adrenals is background. **a**, adrenal gland; **k**, kidney.

**Fig. S2 – related to Fig. 2: Adrenals from  $-KTS^{GOF}$  animals are fully functional.** (A)  $3\beta$ HSD2 (which stains adrenocortical steroidogenic cells of all the zones) and AKR1b7 (*zona fasciculata*) immunostaining shows disorganization of the cortical architecture in  $-KTS^{GOF}$  mice. While disorganized, the cortical zonation is maintained. (B)  $20\alpha$ HSD immunostaining on adrenals from 5 weeks old littermate female mice showing reduction in X-zone in  $-KTS^{GOF}$  animals. (C) Despite the severe phenotype observed, circulating corticosterone levels in adult  $-KTS^{GOF}$  mice are unchanged (left panel), whereas a slight increase in ACTH is observed (right panel). (D) Quantification of cellular size using the program ‘cell profiler’ showed slight hypertrophy of steroidogenic cells in  $-KTS^{GOF}$  animals (CTR:  $934.93 \pm 66.60$  pixels, n=14;  $-KTS^{GOF}$ ;  $1033.91 \pm 62.77$  pixels, n=9;  $**P < 0.005$ , using student t test). (E) RT-Q-PCR performed on RNA extracted from adult adrenal glands shows no significant differences in expression of *Cyp11B1*, *Cyp11B2*, *Cyp21A1*, *Cyp11A1*, *Sf1*, and *StaR* between wild type and  $-KTS^{GOF}$  mice. (F-G) Hematoxylin and eosin staining showed normal adult gonads in both XX and XY  $-KTS^{GOF}$  animals and the presence of spermatozoa in epididymis of males (G). *p450scc* (H) and *21-hydroxylase* (I) RNA *in situ* hybridization of gonadal sections from E 14.5 (XY) and E15.5 (XX)

embryos. (J) RT-Q-PCR performed on RNA extracted from E12.5 gonads showed no significant increase of either WT1+ or -KTS isoforms in -KTS<sup>GOF</sup> samples.

**Fig. S3 – related to Fig. 3: Molecular analysis of -KTS<sup>GOF</sup> adrenals and putative targets.** (A) *Ptch1* and *Shh* RNA *in situ* hybridization on E15.5 (C) CTR, -KTS<sup>GOF</sup> and +KTS<sup>GOF</sup> embryos. (B) Quantification of *Ptch1* and *Shh* messengers. **E14.5:** *Ptch1*, CTR: 100 ± 69.40 n=5, -KTS<sup>GOF</sup>: 195.00 ± 24.80, n=6; *Shh*, CTR: 100 ± 30.60, n=6; -KTS<sup>GOF</sup>: 150.29 ± 29.69, n=6. **Adult:** *Ptch1*, CTR: 100 ± 24.11, n=8; -KTS<sup>GOF</sup>: 253.76 ± 186.99, n=6; *Shh*, CTR: 100 ± 85.08, n=7; -KTS<sup>GOF</sup>: 121.25 ± 119.09, n=6. \*  $P < 0.05$  using student T test. The data presented are normalized for *Hprt1* expression. (C, D) Snapshots from UCSC genome browser showing ChIP sequencing data on chromatin from E18.5 kidneys immunoprecipitated with anti WT1 or CTR (DICER) antibodies. WT1 strongly binds to a position -48.5Kb upstream of the *Tcf21* gene (chr10: 22,588,088-22,588,616) corresponding to an evolutionary conserved region (ECR), which was also identified in WT1 ChIPs on -KTS<sup>GOF</sup> adrenals. No peaks of WT1 binding were instead detected for the ECRs located at positions -1.5Kb (chr10: 22,541,258-22,541,553) and -2.7Kb (chr10: 22,542,363-22,542,597) (C). Alignment of the *Gli1* gene landscape with kidney ChIP seq data showing a peak in the intronic region (chr10:126,775,799-126,776,198) that was also found enriched in WT1 ChIPs on -KTS<sup>GOF</sup> adrenals (D). Arrows indicate the regions for which WT1 ChIP PCRs (depicted in fig. 3F) were performed.

**Fig. S4 – related to Fig. 4: WT1<sup>+</sup> cells generate SF1<sup>+</sup> and SF1<sup>-</sup> (interstitial) adrenocortical cells during development.** (A) SF1(red) and GFP (green) immunostaining on adrenal sections from 3 weeks old *WT1:Cre-GFP/mTmG* mice. The GFP signal reflects cells in which mTmG derived GFP has been permanently switched on. (B-D) Sections from *Wt1:Cre-ERT2; mTmG* animals force fed at E 14.5. WT1 (red) GFP (green) immunofluorescence on adrenal sections from E 18.5 *Wt1:Cre-ERT2; mTmG* embryos treated with tamoxifen at E14.5 showing differentiated steroidogenic GFP<sup>+</sup> cells (B), WT1<sup>+</sup> GFP<sup>+</sup> cells within the cortex (C) and interstitial cortical GFP<sup>+</sup> cells (WT1<sup>-</sup>) (D). (E-F) GFP (green) LacZ (red) WT1 (blue) immunofluorescence on adrenal sections from E18.5 old *Wt1:Cre-ERT2; mTmG; Gli1:LacZ* embryos treated with tamoxifen at E12.5. At least four different populations of cells can be described by the expression of WT1 and GLI1: WT1<sup>+</sup>

GLI1<sup>+</sup> capsular cells (E, arrows), WT1<sup>+</sup> GLI1<sup>-</sup> capsular (E, arrowheads), WT1<sup>-</sup> GLI1<sup>+</sup> capsular (E, asterisk) and WT1<sup>+</sup> GLI1<sup>-</sup> cortical (F, inset). (G) Quantification of the number of GFP<sup>+</sup> patches of cells within the adrenal cortex of E18.5 embryos and 3 weeks old *Wt1:Cre-ERT2; mTmG* mice treated with tamoxifen at E14.5. The overall number of GFP<sup>+</sup> clusters increases from  $4.9 \pm 2.42$  ( $2.6 \pm 1.84$  WT1<sup>+</sup>,  $2.3 \pm 2.45$  WT1<sup>-</sup>) (N=10) to  $16.33 \pm 4.78$  ( $1.25 \pm 0.84$  WT1<sup>+</sup>,  $14.0 \pm 4.55$  WT1<sup>-</sup>) (N=5).

**Fig. S5 – related to Fig. 5: Adult WT1<sup>+</sup> cortical cells are neither steroidogenic nor endothelial cells.** (A-C) Sections of adrenal glands from *Wt1:Cre-ERT2; mTmG* mice treated with tamoxifen at 10 to 12 weeks and sacrificed one month after the last administration. *P450scc* (A) and *21 hydroxylase* (B) RNA *in situ* hybridization demonstrates that under normal conditions the majority of GFP<sup>+</sup> cells are non-steroidogenic. (C) Likewise no colocalisation between the vascular marker PECAM1 (red) and GFP (green) was detected. (D) Similar results were obtained when GFP activation was performed during development.

**Fig. S6 – related to Fig. 6: WT1<sup>+</sup> cortical clusters increase rapidly after gonadectomy.** (A) WT1 (blue) GATA4 (red) and GFP (green) immunofluorescence on a section of an adrenal glands from *Wt1:Cre-ERT2; mTmG* mice gonadectomized after treatment with tamoxifen at 10 to 12 weeks and collected 10 weeks after gonadectomy. (B) Schematic representation of the experiment shown in C and D. (C-D) Quantification of the number of GFP<sup>+</sup> cell clusters in the adrenal cortex of male (C) and female (DC) *Wt1:Cre-ERT2; mTmG* mice gonadectomized after treatment with tamoxifen at 3 weeks. \*  $P < 0.05$  using student T test.

**Table S1 – related to Fig. 2: Adrenal weight in wildtype and -*KTS*<sup>GOF</sup> mice.**

## Primers table

| Name                | Direction | Sequence               | Usage                          |
|---------------------|-----------|------------------------|--------------------------------|
| Rosa26 common       | sense     | AGGGAGCTGCAGTGGAGTAG   | genotyping Rosa26:Wt1-KTS mice |
| Pgk                 | antisense | GAAAAGGCGCTCCCTACCC    | genotyping Rosa26:Wt1-KTS mice |
| Rosa WT             | antisense | AGCCTGCCAGAAGACTCCC    | genotyping Rosa26:Wt1-KTS mice |
| Tcf21 S             | sense     | AGATCCTGGCCAACGACAAG   | Tcf21 in situ probe            |
| Tcf21 AS            | antisense | CCAGGCTTGAGTCATTATG    | Tcf21 in situ probe            |
| Tcf21 left          | sense     | CATTCACCCAGTCAACCTGA   | Tcf21 Q-PCR, probe 49          |
| Tcf21 right         | antisense | CCACTTCTTCAGGTCATTCTC  | Tcf21 Q-PCR, probe 49          |
| Gli1 left           | sense     | CTGACTGTGCCCGAGAGTG    | Gli1 Q-PCR, probe 84           |
| Gli1 right          | antisense | CGCTGCTGCAAGAGGACT     | Gli1 Q-PCR, probe 84           |
| Cyp11A1 left        | sense     | AAGTATGGCCCCATTTACAGG  | Cyp11A1 Q-PCR, probe 104       |
| Cyp11A1 right       | antisense | TGGGGTCCACGATGTAAACT   | Cyp11A1 Q-PCR, probe 104       |
| Cyp11B1 left        | sense     | GCCATCCAGGCTAACTACAT   | Cyp11B1 Q-PCR, probe 11        |
| Cyp11B1 right       | antisense | CATTACCAAGGGGGTTGATG   | Cyp11B1 Q-PCR, probe 11        |
| Cyp11B2 left        | sense     | GCACCAGTGGAGAGTATGC    | Cyp11B2 Q-PCR, probe 1         |
| Cyp11B2 right       | antisense | CCATTCTGGCCCATTTAGC    | Cyp11B2 Q-PCR, probe 1         |
| Cyp21A1 left        | sense     | AGGAATTCTCCTTCTCACTTGT | Cyp21A1 Q-PCR, probe 51        |
| Cyp21A1 right       | antisense | TGTACCAACGTGCTGTCCCTT  | Cyp21A1 Q-PCR, probe 51        |
| Sf1 left            | sense     | TCCAGTGTCCACCCTTATCC   | Sf1 Q-PCR, probe 12            |
| Sf1 right           | antisense | CGTCGTACGAATAGTCCATGC  | Sf1 Q-PCR, probe 12            |
| Star left           | sense     | TTGGGCATACTCAACAACCA   | Star Q-PCR, probe 11           |
| Star right          | antisense | ACTTCGTCCCCGTTCTCC     | Star Q-PCR, probe 11           |
| Tcf21 ECR2 S        | sense     | GGGCAGGAGCTAAGAGTAAC   | ChIP                           |
| Tcf21 ECR2 AS       | antisense | GGAGCCATAAATCTCCACG    | ChIP                           |
| Tcf21 ECR4 S        | sense     | ATACTTCTTTTTTCCCCCTGC  | ChIP                           |
| Tcf21 ECR4 AS       | antisense | GACCATGTTCAAAGCAATCCTC | ChIP                           |
| Tcf21 FAR ECR S     | sense     | CCCTGGGCTTTAATTCTAAC   | ChIP                           |
| Tcf21 FAR ECR AS    | antisense | TAAGCGTTCAGGAAGGGGG    | ChIP                           |
| Gli Intron S        | sense     | GGGCAGAAGCAGCCGTTTCAG  | ChIP                           |
| Gli Intron AS       | antisense | GAATGACTTTAGCTCTCATCC  | ChIP                           |
| WT1+/-KTS<br>common | sense     | CACCAAAGGAGACACACAGGT  | Wt1 +/- KTS Q-PCR, probe 47    |
| WT1 +KTS AS         | antisense | TTCATTGTTTTACCTGTAT    | Wt1 +/- KTS Q-PCR, probe 47    |
| WT1 -KTS AS         | antisense | GGGCTTTTACCTGTATGAG    | Wt1 +/- KTS Q-PCR, probe 47    |
| LUPub Fr            | sense     | AATGAGTCCATCACGCTGAAAC | LHR in situ probe              |
| LUPub Rev           | antisense | TAGGATGACGTGGCGATGAGCG | LHR in situ probe              |

## Antibodies table

| Protein          | Host   | Type       | Dilution   | Secondary                      | Producer     | Reference         |
|------------------|--------|------------|------------|--------------------------------|--------------|-------------------|
| WT1              | Mouse  | monoclonal | 1:50       | Biothynilated/Streptavidin-Cy3 | Dako         | 6H-F2             |
| WT1 C19          | Rabbit | polyclonal | 1:100      | Biothynilated/Streptavidin-Cy3 | Santa Cruz   | sc 192            |
| SF1              | Rabbit | polyclonal | 1:500-1000 | AlexaFluor 488                 | Morohashi K, | Ref. <sup>2</sup> |
| GFP              | Rabbit | polyclonal | 1:500      | AlexaFluor 488                 | AbCam        | ab290             |
| GFP              | Goat   | polyclonal | 1:200      | Cy5                            | AbCam        | ab5450            |
| GATA4            | Goat   | polyclonal | 1:100      | Cy5                            | Santa Cruz   | sc 1237           |
| CYP17            | Rabbit | polyclonal | 1:500      | AlexaFluor 488                 | Conley A.    |                   |
| PECAM            | Goat   | polyclonal | 1:100      | Cy5                            | Santa Cruz   | sc 1506           |
| AKR1b7           | Rabbit | polyclonal | 1:750      | AlexaFluor 488                 | Martinez A.  | Ref. <sup>2</sup> |
| 20 $\alpha$ -HSD | Rabbit | polyclonal | 1:100      | AlexaFluor 488                 | Weinstein Y. | Ref. <sup>3</sup> |
| 3 $\beta$ HSD2   | Rabbit | polyclonal | 1:1000     | AlexaFluor 488                 | Thomas M.    |                   |

1. Morohashi, K. et al. Functional difference between Ad4BP and ELP, and their distributions in steroidogenic tissues. *Mol Endocrinol* 8, 643-653 (1994).
2. Lefrancois-Martinez, A. M. et al. Decreased expression of cyclic adenosine monophosphate-regulated aldose reductase (AKR1B1) is associated with malignancy in human sporadic adrenocortical tumors. *J Clin Endocrinol Metab* 89, 3010-3019 (2004).
3. Piekorz, R.P., Gingras, S., Hoffmeyer, A., Ihle, J.N., and Weinstein, Y.. Regulation of progesterone levels during pregnancy and parturition by signal transducer and activator of transcription 5 and 20 $\alpha$ -hydroxysteroid dehydrogenase. *Mol Endocrinol* 19, 431-440 (2005).

Figure S1

Bandiera et al

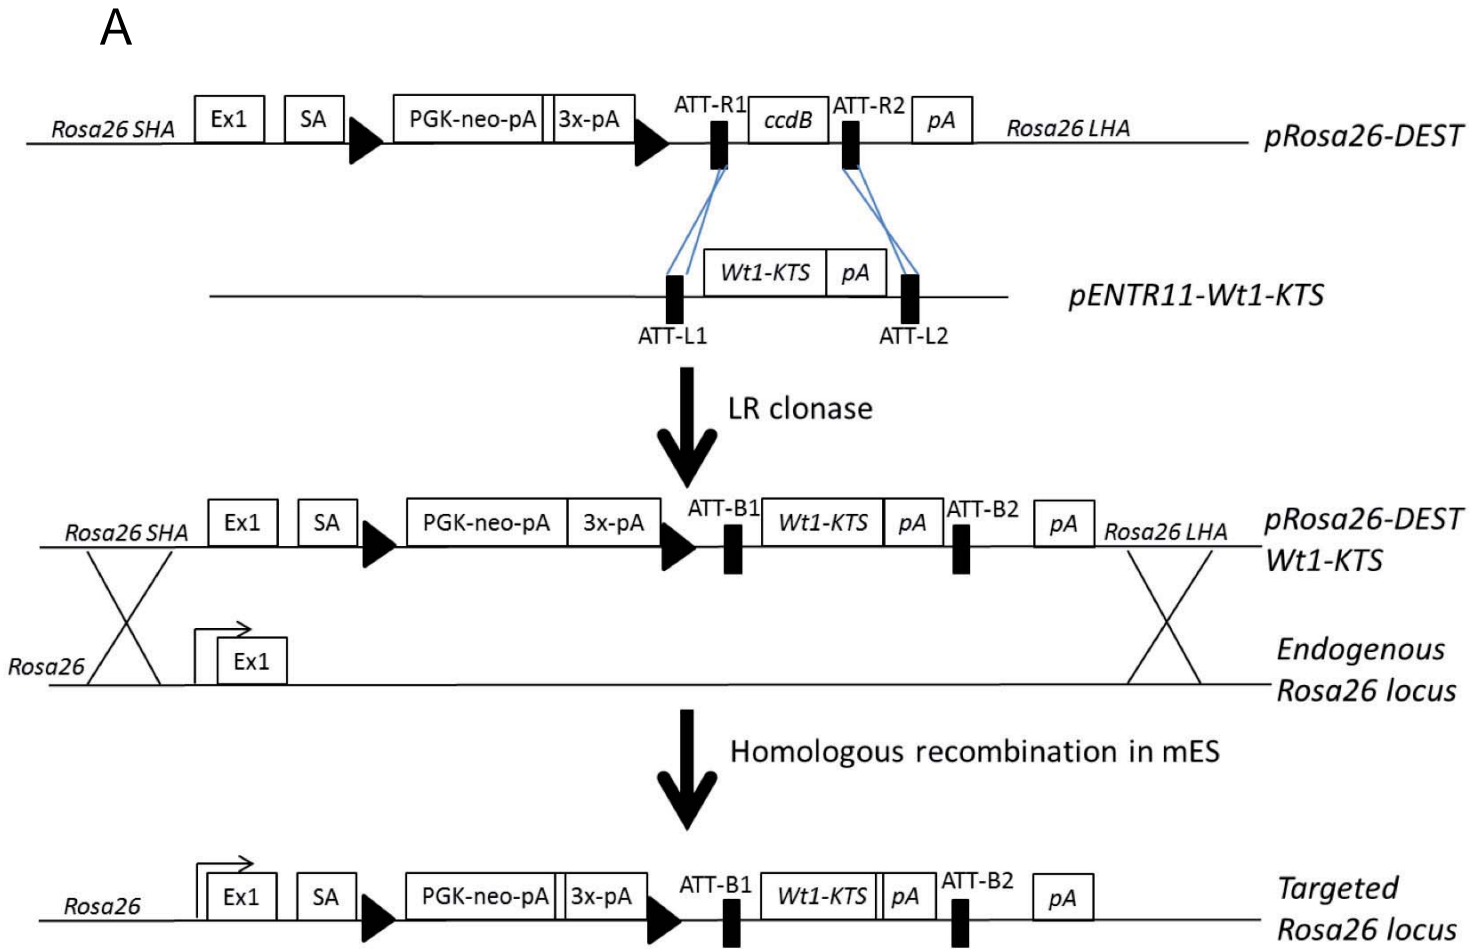

**B**

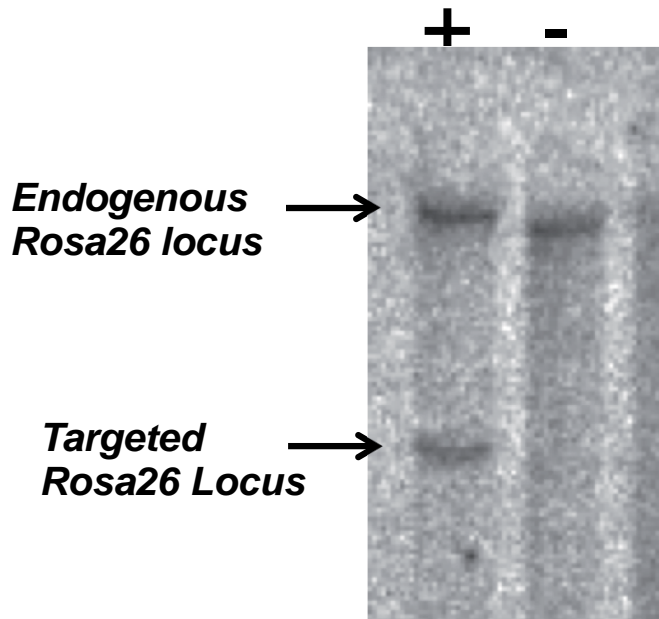

Figure S1

*Bandiera et al*

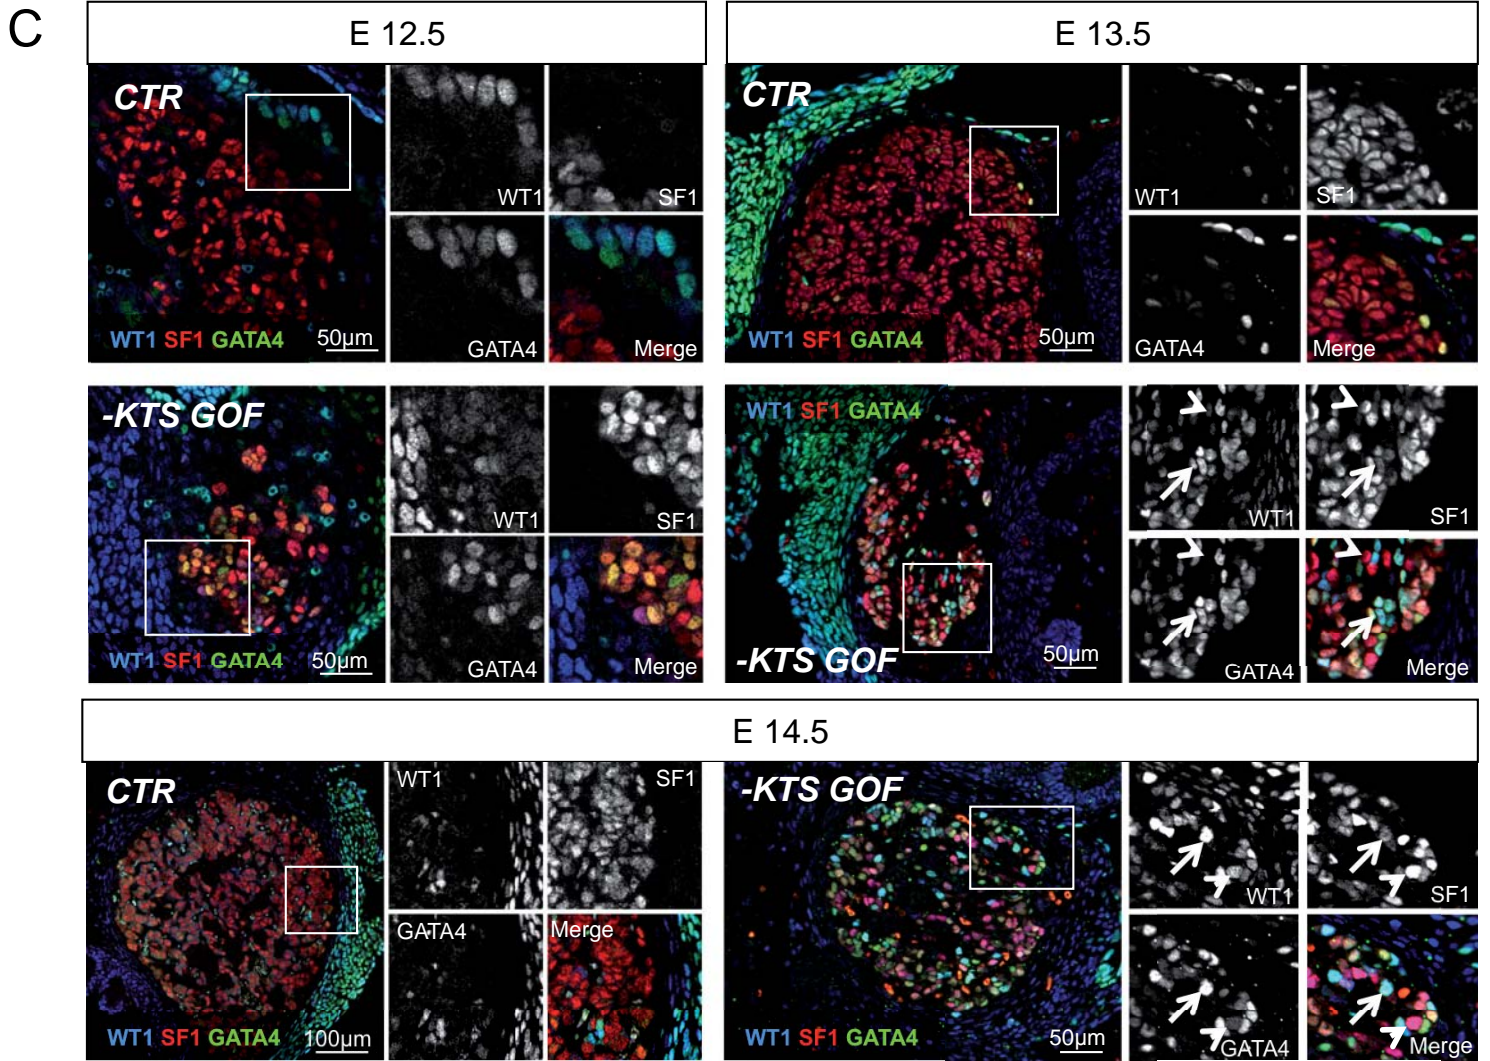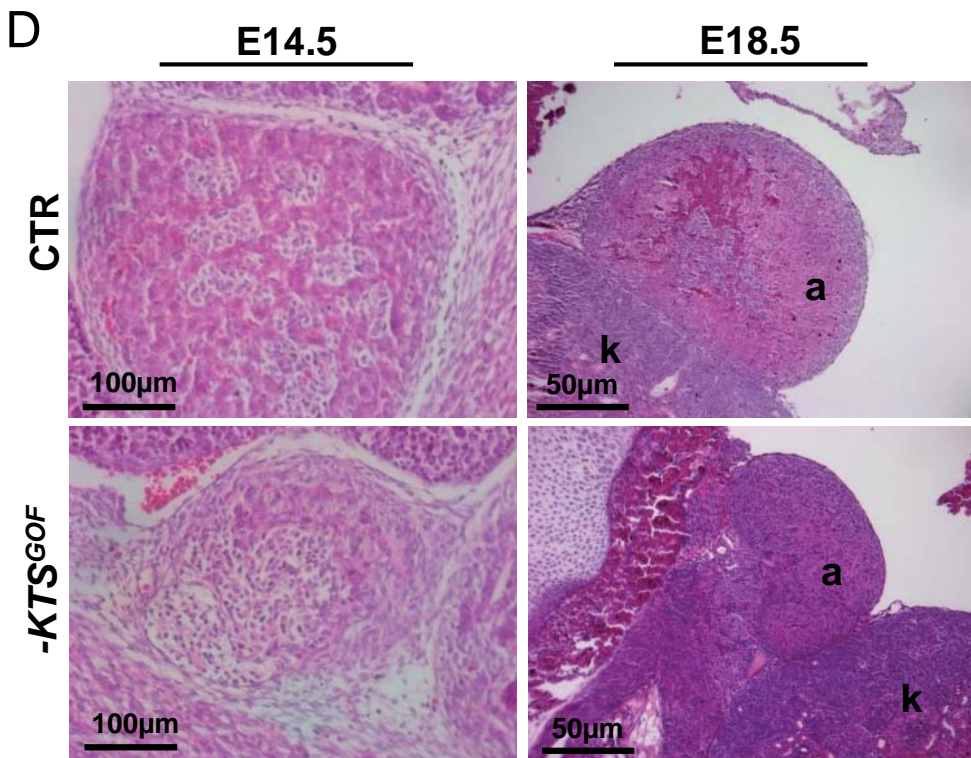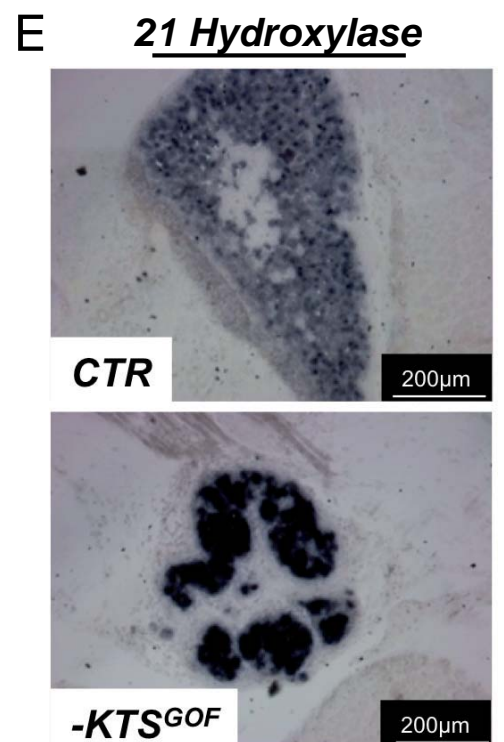

Figure S2

Bandiera et al

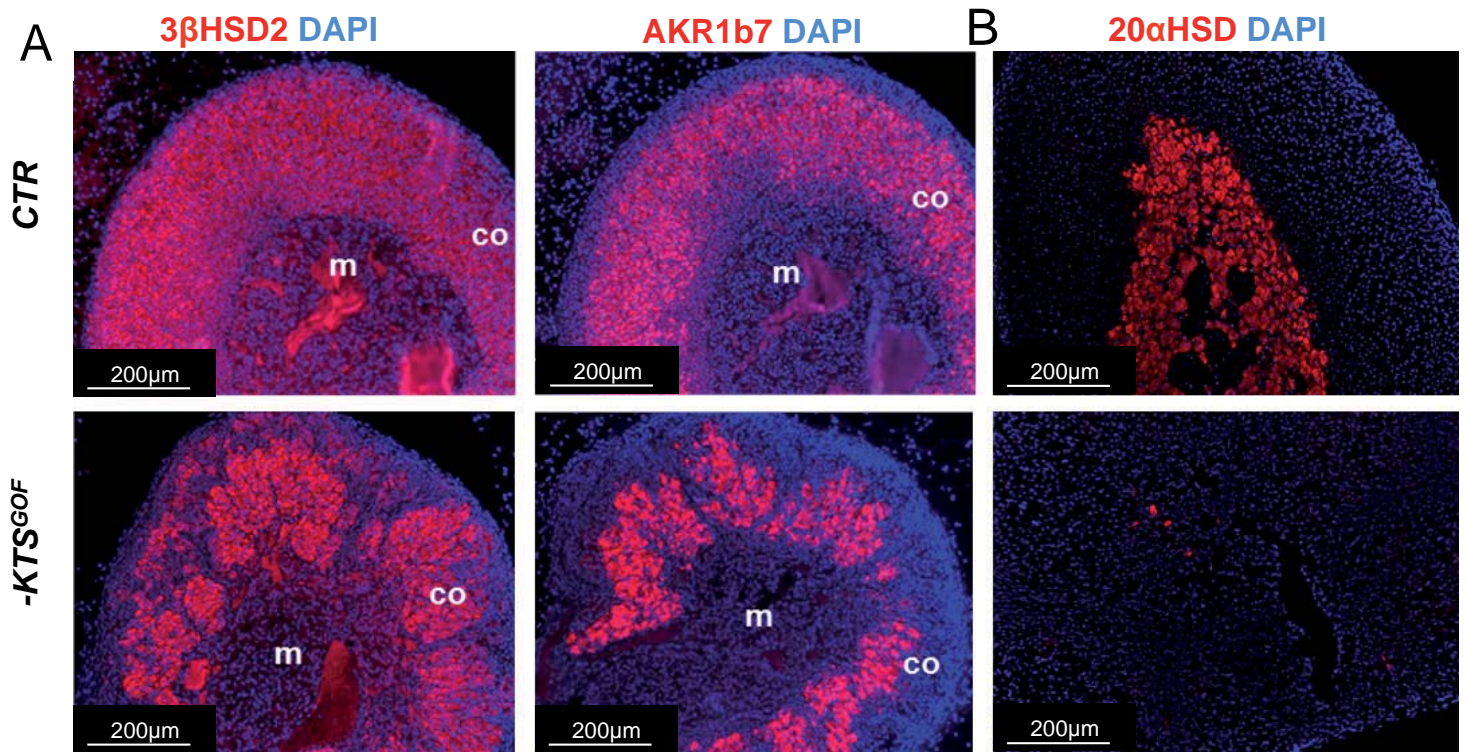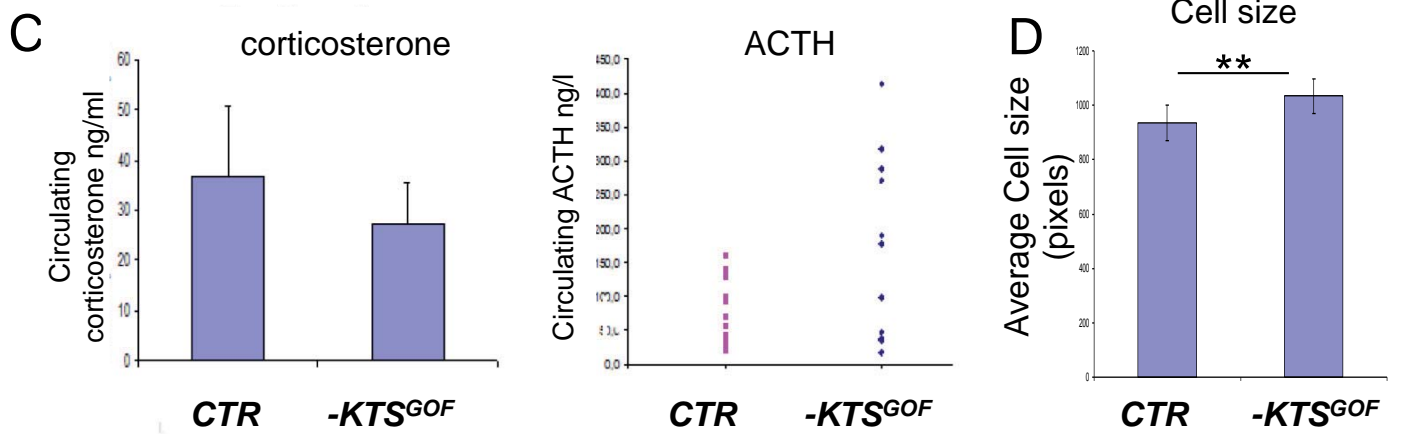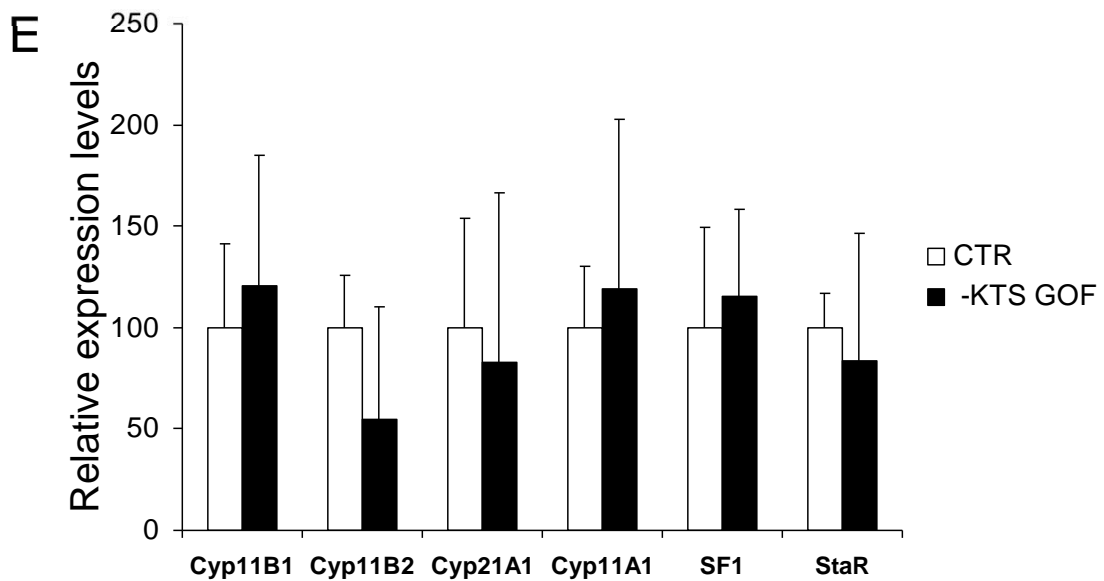



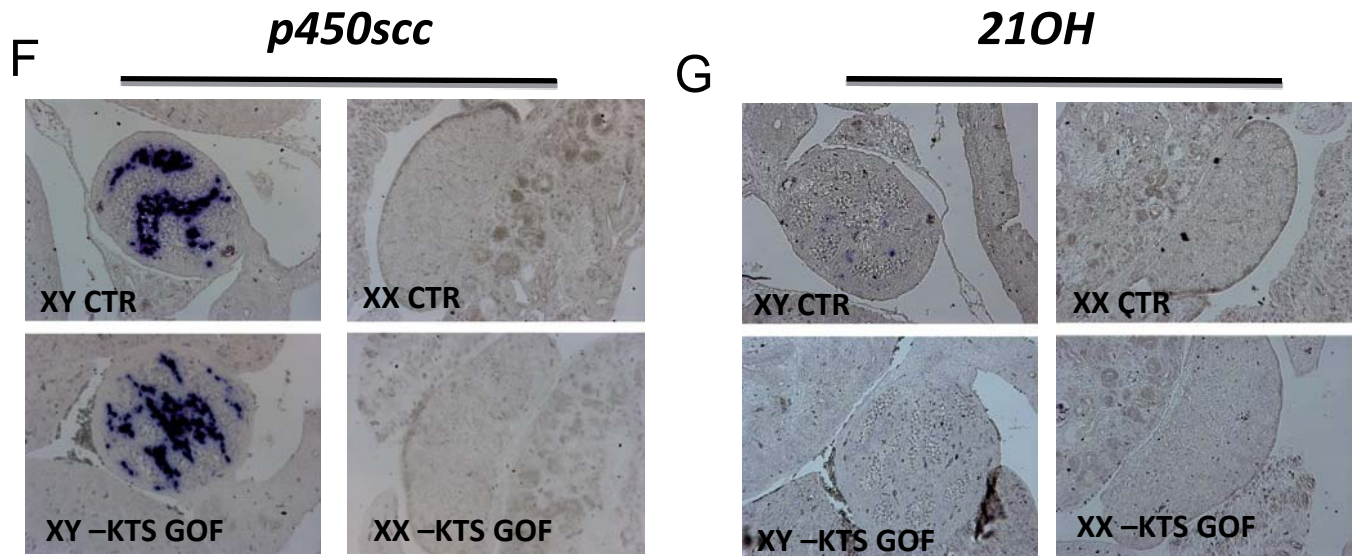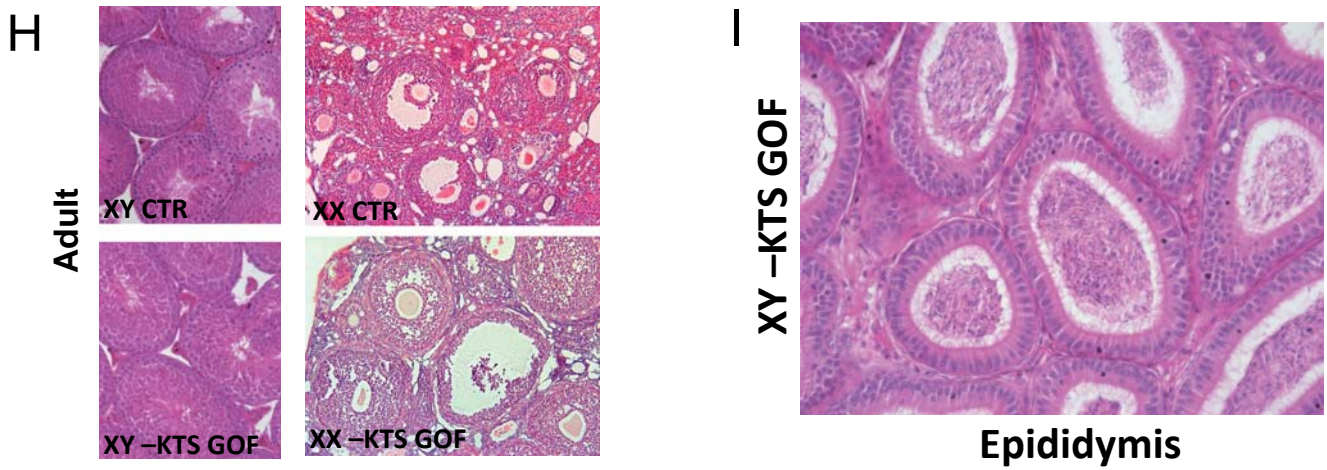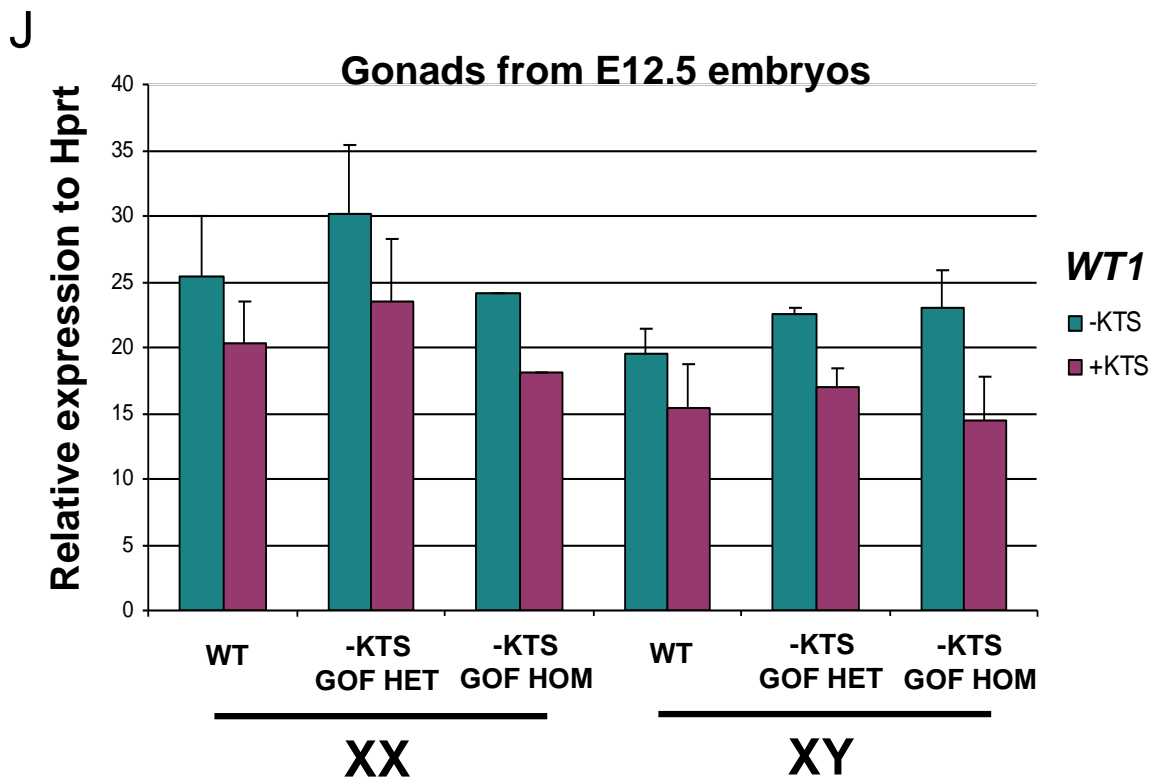

Figure S3

Bandiera et al

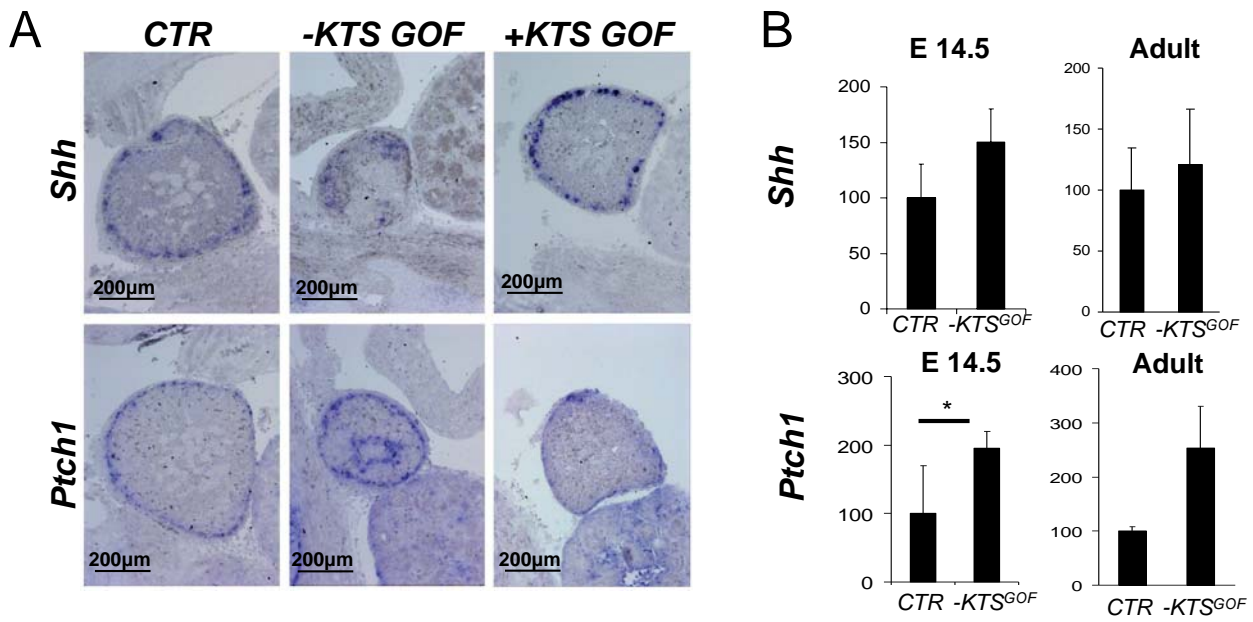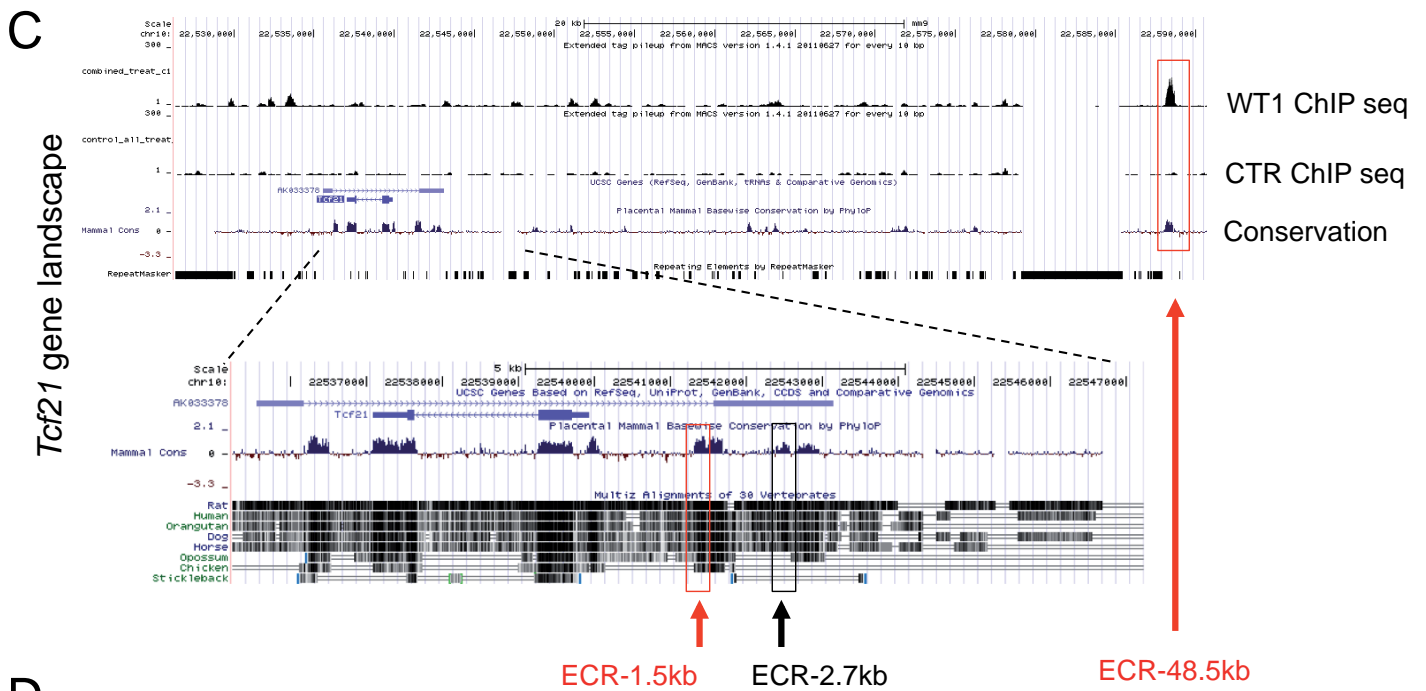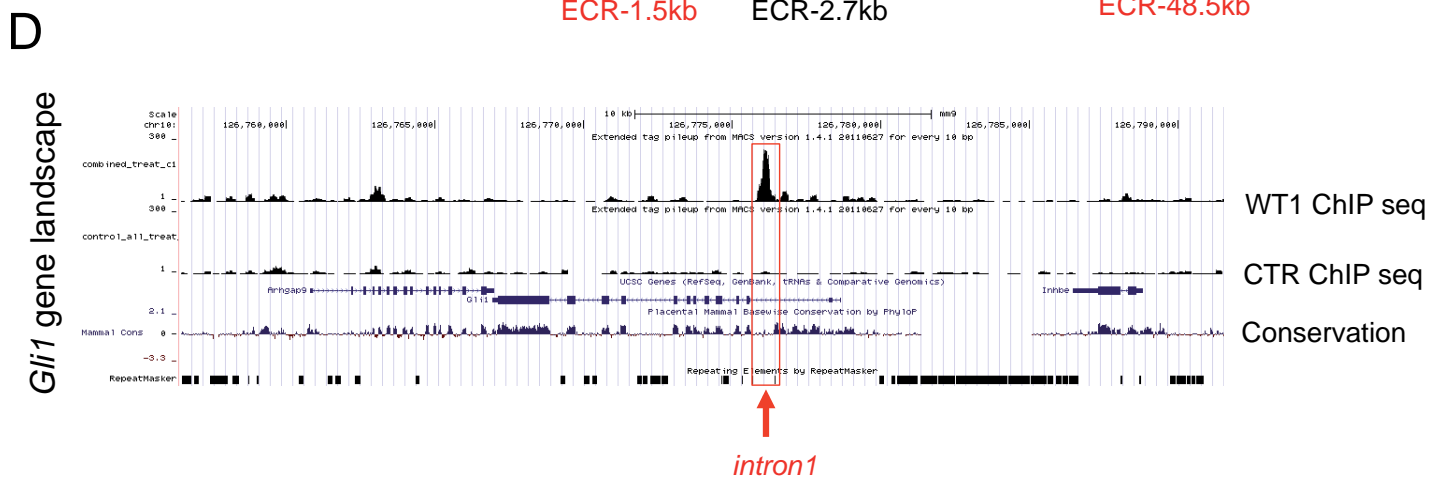

Figure S4

*Bandiera et al*

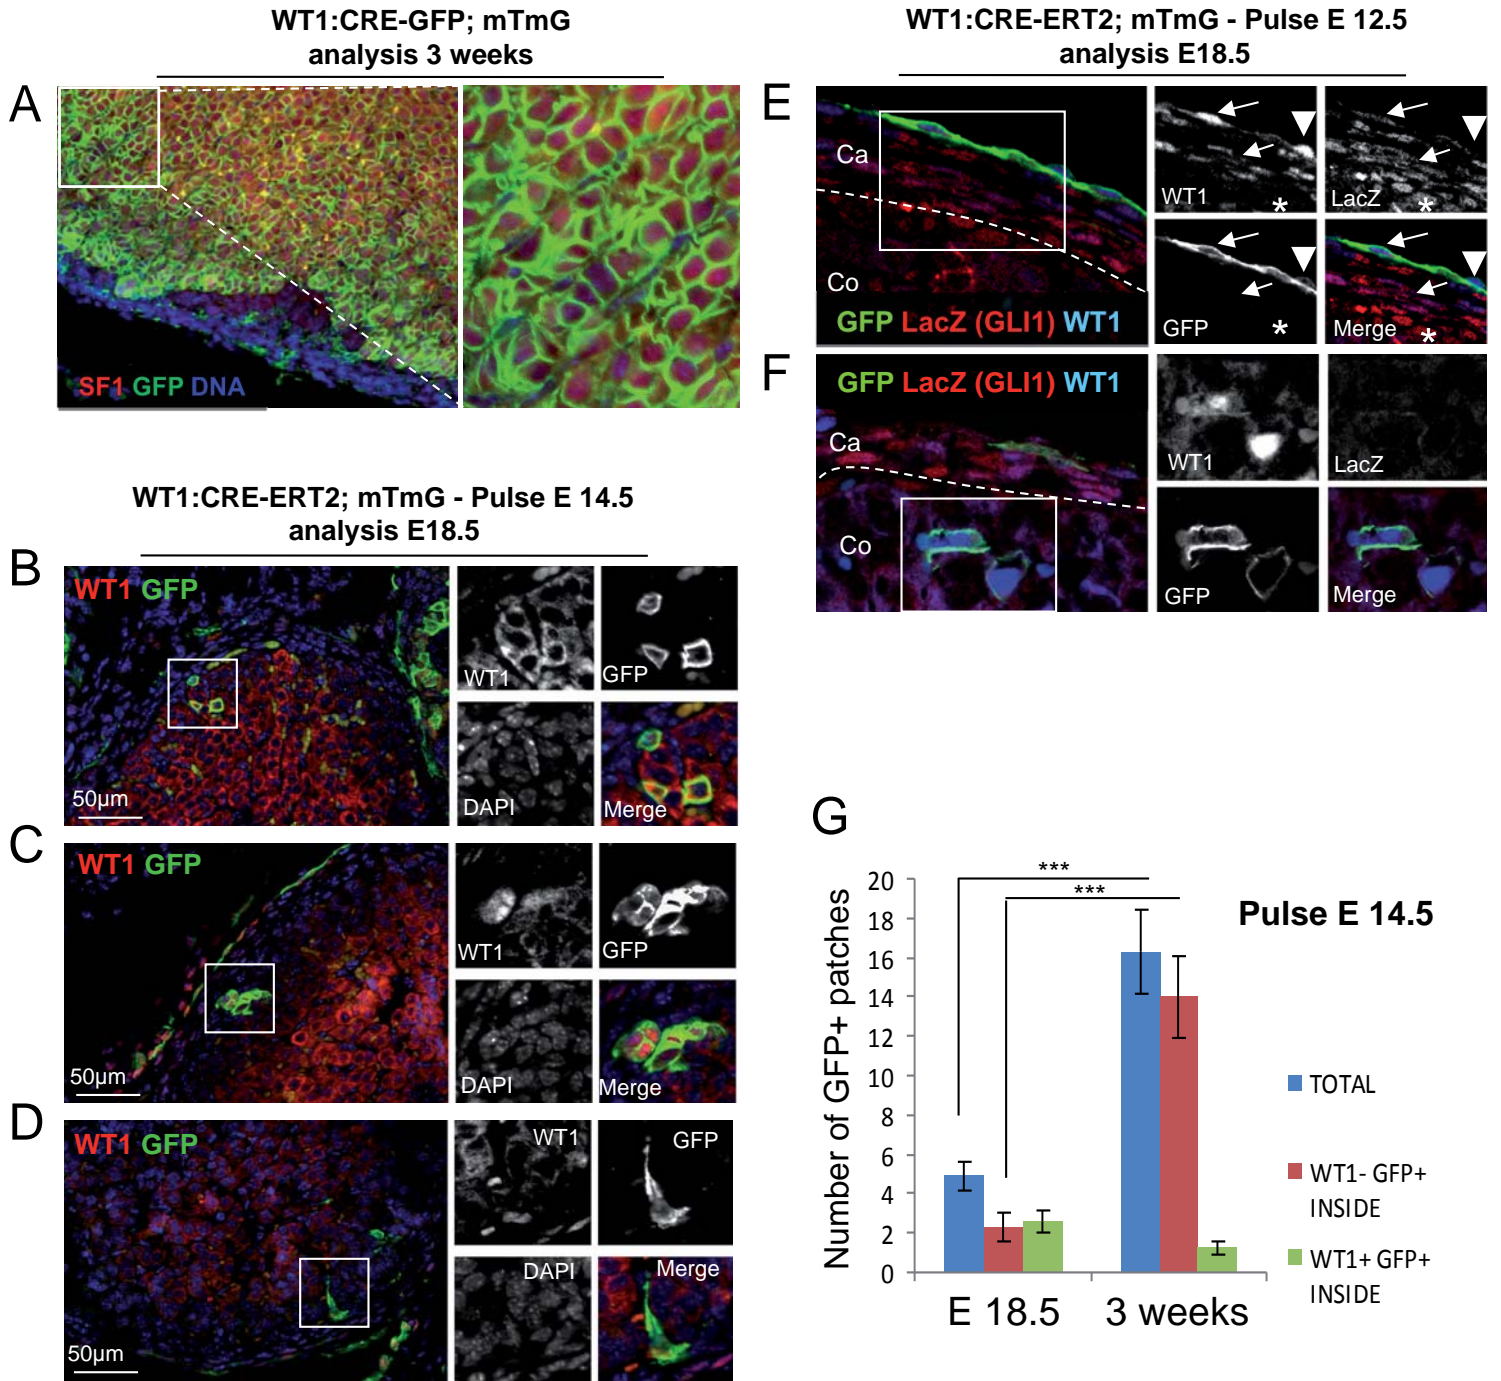

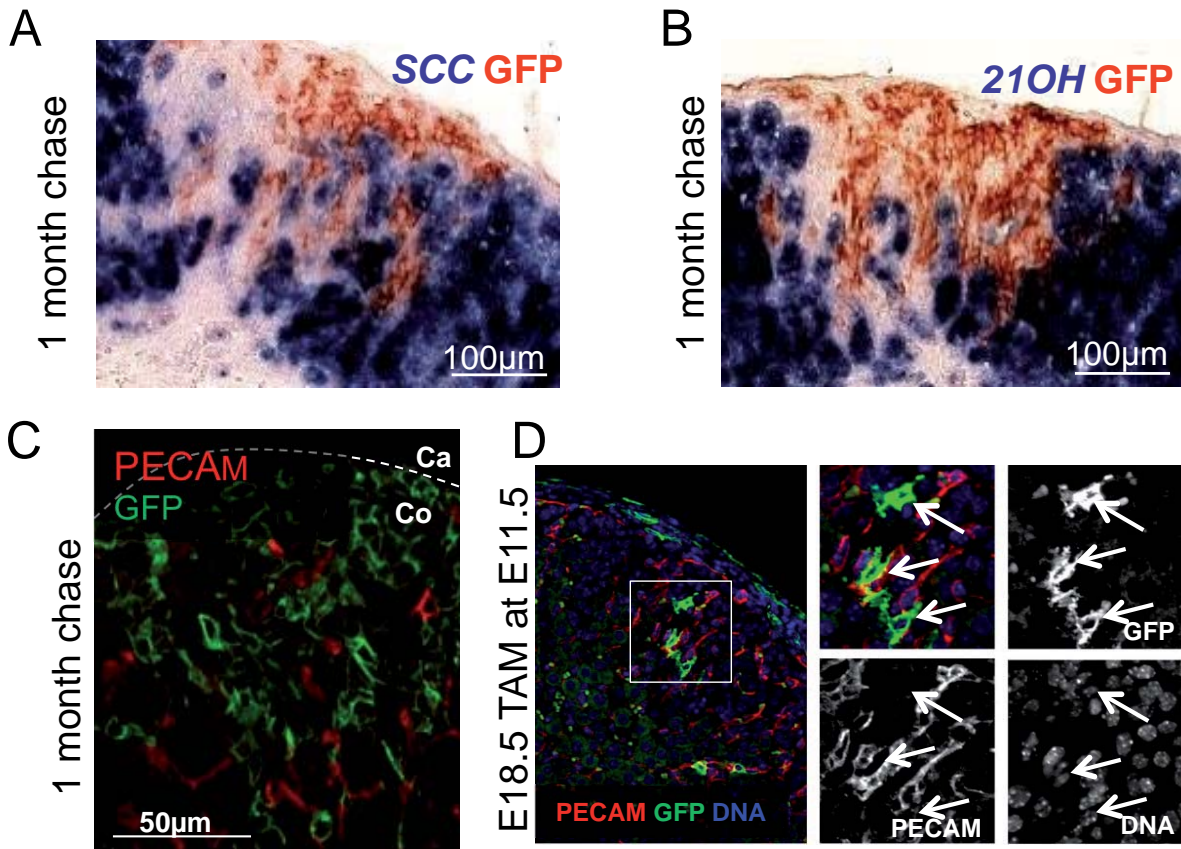

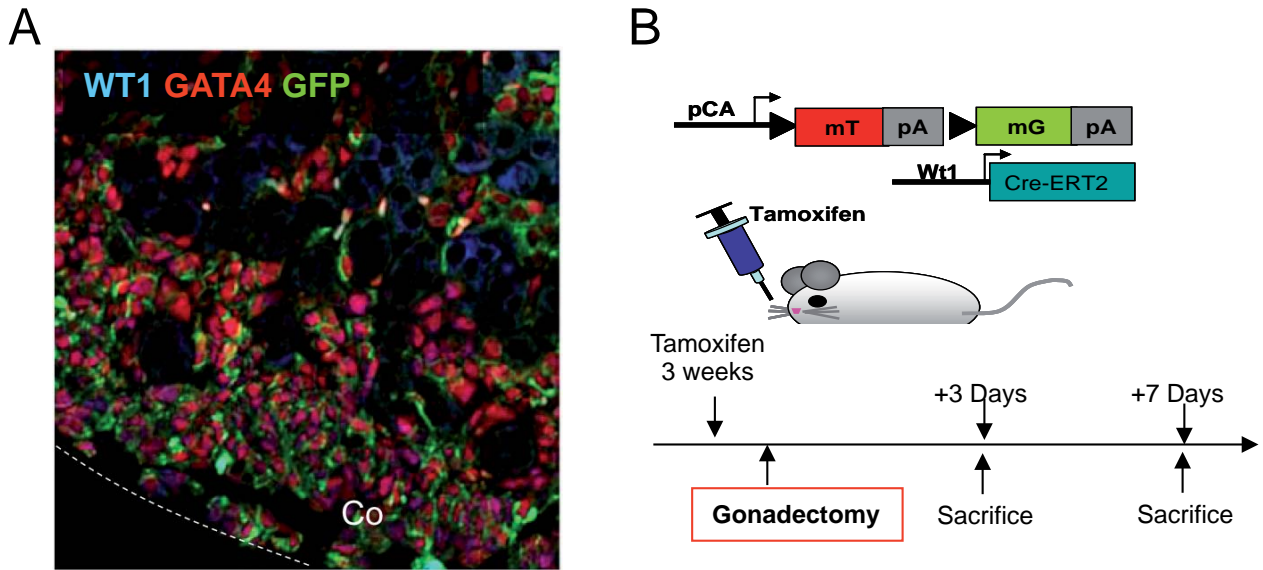

**C** Males  
Number of GFP+ patches within the cortex

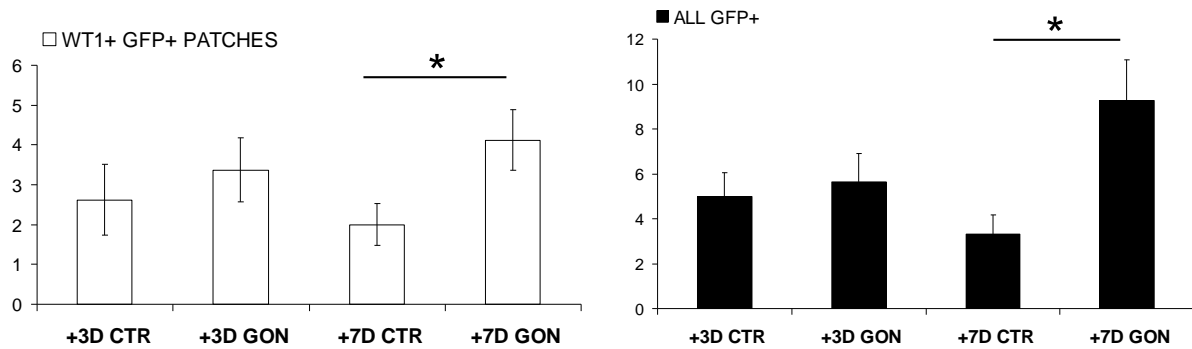

**D** Females  
Number of GFP+ patches within the cortex

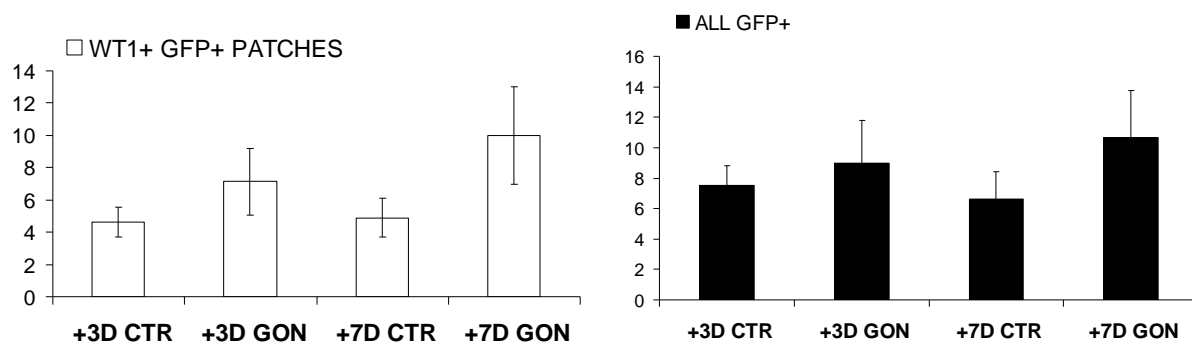

# Table S1

|                                | Weight           |
|--------------------------------|------------------|
| XX wild type                   | 2.90 ± 0.707 mg  |
| XX - <i>KTS</i> <sup>GOF</sup> | 1.067 ± 0.404 mg |
| XY wild type                   | 1.650 ± 0.20 mg  |
| XY - <i>KTS</i> <sup>GOF</sup> | 0.760 ± 0.216 mg |
